# Supplementary material for: Investigating the effect of verapamil on preservation of beta-cell function in adults with newly diagnosed type 1 diabetes mellitus (Ver-A-T1D): protocol for a randomised, double-blind, placebo-controlled, parallel-group, multicentre trial
Source: PubMed Central journal article supplement — BMJ Open. 2024 Nov 28;14(11):e091597. doi: 10.1136/bmjopen-2024-091597 (PMC11605811; doi:10.1136/bmjopen-2024-091597), 2024-11-28
Supplement: bmjopen-14-11-s005.pdf [file bmjopen-14-11-s005.pdf]

### Data Sharing Plan (Ver-A-T1D)

|                                                                              |                                                                                                                                                                                                                                                                                 |
|------------------------------------------------------------------------------|---------------------------------------------------------------------------------------------------------------------------------------------------------------------------------------------------------------------------------------------------------------------------------|
| Will individual participant data be available (including data dictionaries)? | yes                                                                                                                                                                                                                                                                             |
| What data in particular will be shared?                                      | Individual participant data that underlie the results reported in this article after deidentification (text, tables, figures, and appendices).                                                                                                                                  |
| What other documents will be available?                                      | Study protocol                                                                                                                                                                                                                                                                  |
| When will data be available ? (start and end dates)                          | Beginning after publication of the primary results papers reporting the prespecified endpoints described in the Statistical analysis plan. (no end date)                                                                                                                        |
| With whom?                                                                   | Researchers who provide a methodologically sound proposal – and if needed an ethics approval for the project                                                                                                                                                                    |
| For what types of analyses?                                                  | For research projects. To achieve aims in the approved proposal at the level of individual data including for meta-analyses                                                                                                                                                     |
| By what mechanism will data be made available?                               | Proposals should be directed to the Chief-Investigator (who may consult with other members of the trial team).<br><br>To gain access, data requestors will need to sign a data access agreement.<br><br>Data will be made available directly to the person requesting the data. |
